# Supplementary figures and images for: The effects of Sr-substitution in Ba 2 SmTi 2 Nb 3 O 15 ceramics: structural study, optical properties, and complex impedance spectroscopy
Source: Royal Society of Chemistry journal article supplement (doi:10.1039/d4ra00068d), 2024-01-01

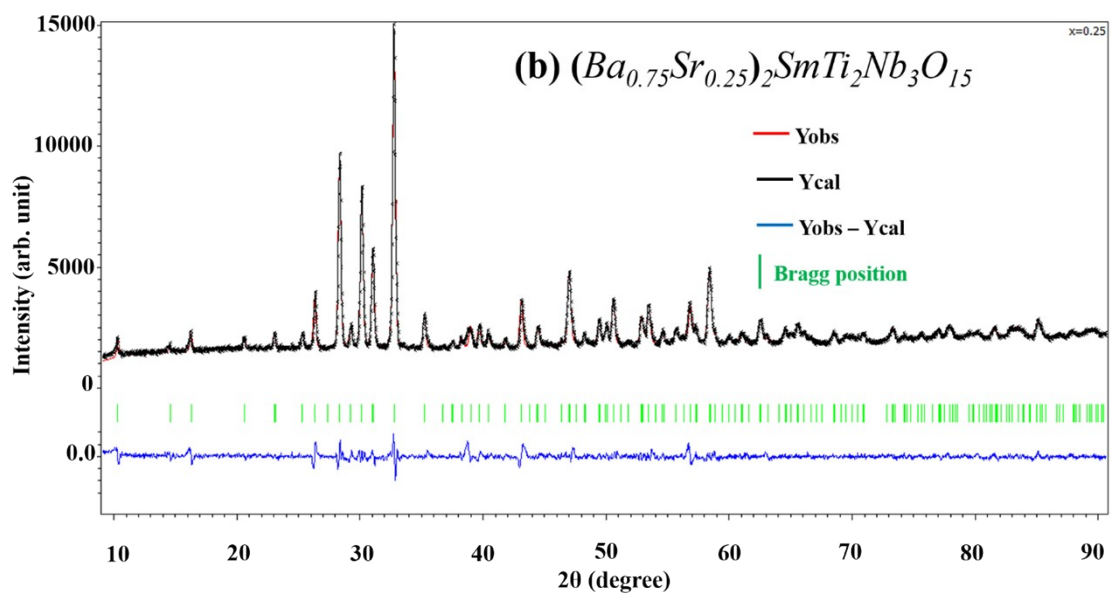

Figure S1: X-ray diffraction refinement for  $BS_xSTN$  powder  $x=0.25$ .

Supplement: d4ra00068d1.pdf [file d4ra00068d1.pdf]

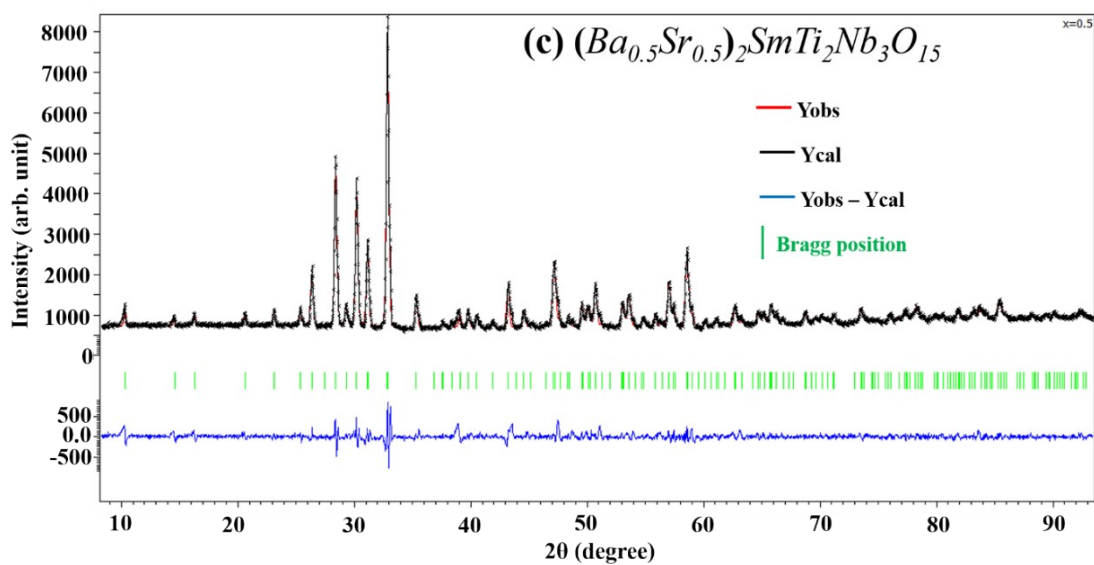

Figure S2: X-ray diffraction refinement for  $BS_xSTN$  powder  $x=0.5$ .

Supplement: d4ra00068d2.pdf [file d4ra00068d2.pdf]
